# Supplementary material
Source: PubMed Central journal article supplement (PMC5244303)

**A novel rhamnose-rich hetero-exopolysaccharide isolated from  
*Lactobacillus paracasei* DG activates host's immune cells**

Silvia Balzaretti<sup>a</sup>, Valentina Taverniti<sup>a</sup>, Simone Guglielmetti<sup>a\*</sup>, Walter Fiore<sup>b</sup>, Mario Minuzzo<sup>c</sup>, Hansel N. Ngo<sup>d</sup>, Judith B. Ngere<sup>d</sup>, Sohaib Sadiq<sup>d</sup>, Paul N. Humphreys<sup>e</sup> and Andrew P. Laws<sup>d\*</sup>

<sup>a</sup> Department of Food, Environmental and Nutritional Sciences (DeFENS), Division of Food Microbiology and Bioprocesses, Università degli Studi di Milano, Italy.

<sup>b</sup> Sofar S.p.A., Italy.

<sup>c</sup> Department of Biosciences, Università degli Studi di Milano, Milano, Italy

<sup>d</sup> Department of Chemical Sciences, University of Huddersfield, Queensgate, Huddersfield, United Kingdom.

<sup>e</sup> Department of Biological Sciences, University of Huddersfield, Queensgate, Huddersfield, United Kingdom.

Running title: *Lactobacillus paracasei* DG exopolysaccharide

Key words: Capsular EPS, Probiotic, Enterolactis, *L. casei* DG<sup>®</sup>, Immunostimulatory, THP-1, MAMPs

\*Corresponding authors: [simone.guglielmetti@unimi.it](mailto:simone.guglielmetti@unimi.it) & [a.p.laws@hud.ac.uk](mailto:a.p.laws@hud.ac.uk)

**Figure S1.** Gene expression analysis by qRT-PCR in human macrophages THP-1 after 4 h stimulation with strain *L. paracasei* DG (MOI 50) and strain DG after removal of the exopolysaccharide (EPS) (nDG; MOI 50), with or without the addition of purified the EPS molecule ( $1 \mu\text{g ml}^{-1}$ ). Expression levels of TNF- $\alpha$ , IL-6, IL-8, and CCL20 are shown as the fold change of induction (FOI) relative to the control (unstimulated macrophages), which was set at a value of 1 (red line). Data are presented as mean of two independent experiments conducted in duplicate  $\pm$  standard deviation. Asterisks indicate statistically significant differences according to two-tailed unpaired Student's t test: \*,  $P < 0.05$ ; \*\*,  $P < 0.01$ . Non-significant P values under 0.1 are specified in the figure.

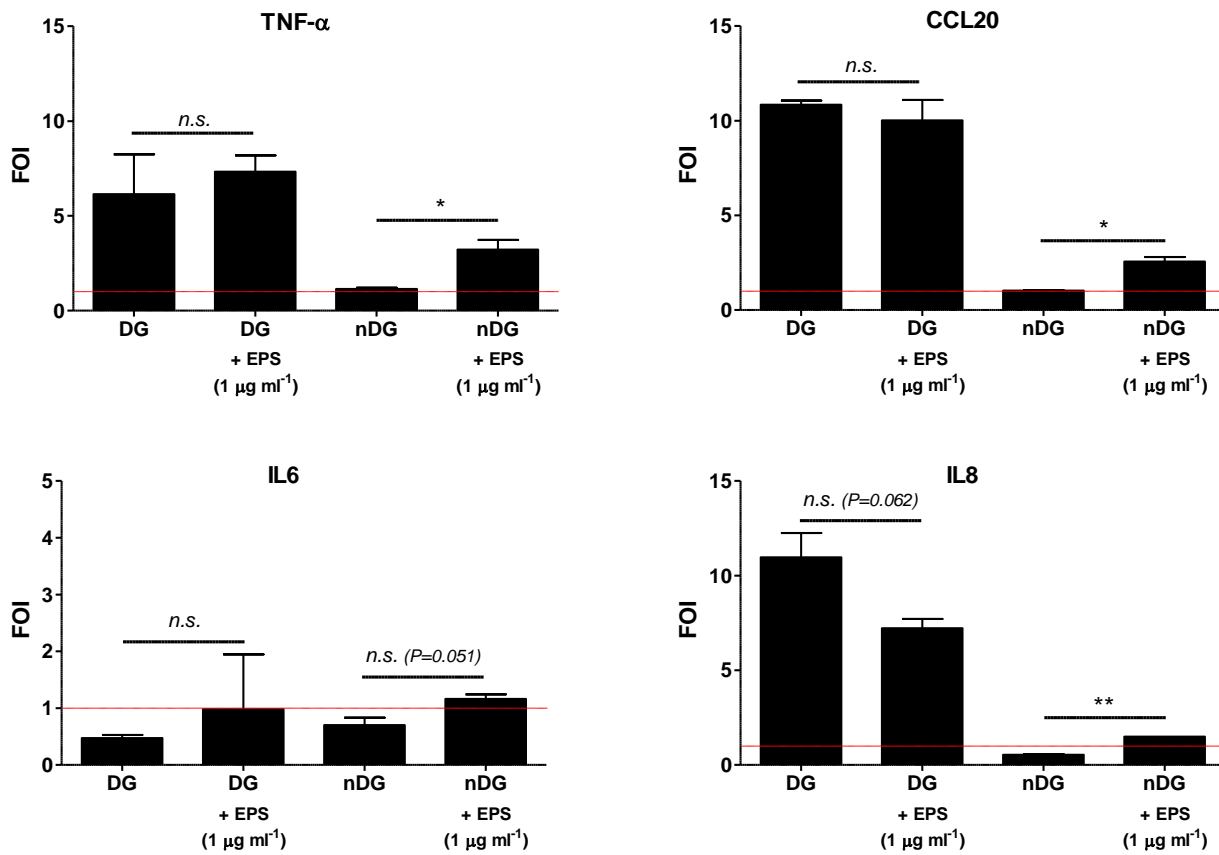

Supplement: AEM.02702-16_zam999117633s1.pdf [file AEM.02702-16_zam999117633s1.pdf]
